# Supplementary material for: HIV-1 gp120 Interactions with Nicotine Modulate Mitochondrial Network Properties and Amyloid Release in Microglia
Source: Springer Nature journal article supplement (doi:10.1007/s11064-025-04357-3), 2025-02-24
Supplement: MOESM1 [file 11064_2025_4357_MOESM1_ESM.pdf]

**Supplement Figure 1.** HMC3 cell viability assay assessed by a trypan blue exclusion assay. The percentage of living cells is compared to total cell count under the same experimental conditions: control (PBS for 72 hr), gp120C (500pM for 24 hr), nicotine (10 $\mu$ M for 72 hr) and nicotine+gp120C (10 $\mu$ M nicotine for 72 hr + 500pM gp120C for the last 24 hr). Top histogram: Average values  $\pm$  standard error of the mean (SEM) from 3 separate experiments. Bottom table: Student's t-test analysis does not show an effect of an experimental condition ( $p > 0.05$ ).

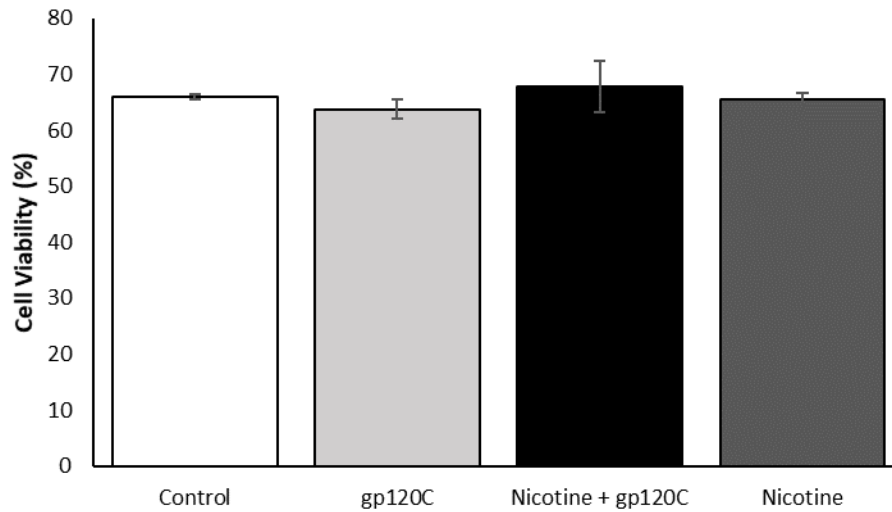

| Groups                      | t-statistic | p-value |
|-----------------------------|-------------|---------|
| PBS vs Nicotine             | 0.368       | 0.7316  |
| PBS vs Nicotine+gp120C      | 0.369       | 0.7308  |
| PBS vs gp120C               | 1.245       | 0.2810  |
| Nicotine vs Nicotine+gp120C | 0.458       | 0.6711  |
| Nicotine vs gp120C          | 0.850       | 0.4433  |
| Nicotine+gp120C vs gp120C   | 0.805       | 0.4661  |
